# Supplementary material
Source: PubMed Central journal article supplement (PMC5530765)
Supplement: NIHMS867561-supplement-3.pdf [file NIHMS867561-supplement-3.pdf]

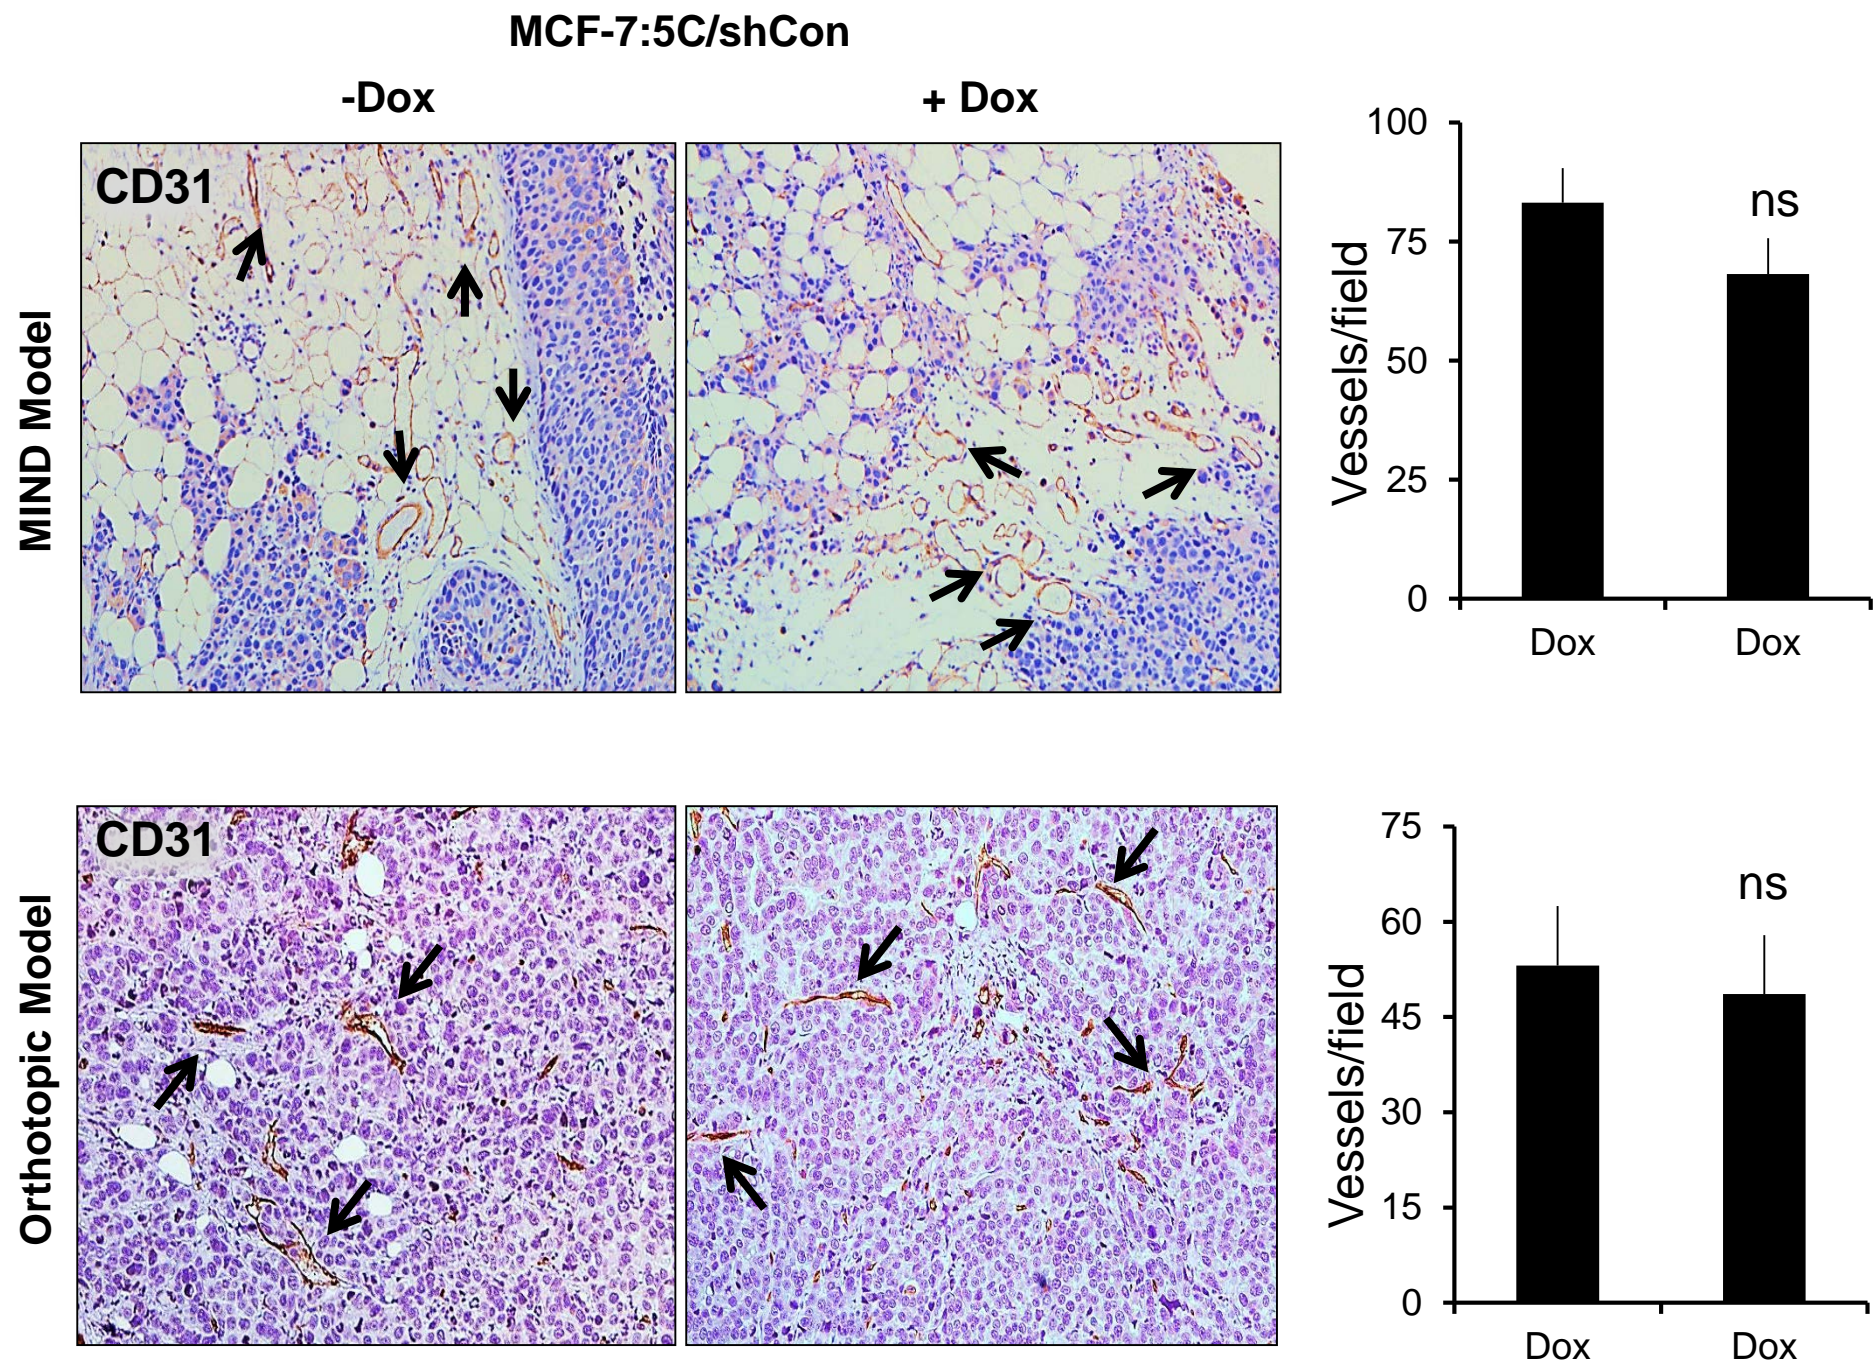

**Supplementary Figure 8. IFITM1 expression is associated with angiogenesis.** (a) MCF-7:5C/shCon cells were injected into the 4<sup>th</sup> mammary gland of ovariectomized female NSG mice using either the MIN or orthotopic model. (b) 3 million MCF-7/C9Con, MCF-7/IF-1, MCF-7/IF-2 cells were injected into the 4<sup>th</sup> mammary fat pad of female NSG mice. Immunohistochemical staining for CD31 visualized the blood vessels in each tumor. The number CD31 positive blood vessels was quantified using at least 4 random 10x fields in each group. Arrows indicate CD31+ blood vessels.
