# Supplementary material
Source: PubMed Central journal article supplement (PMC5530765)

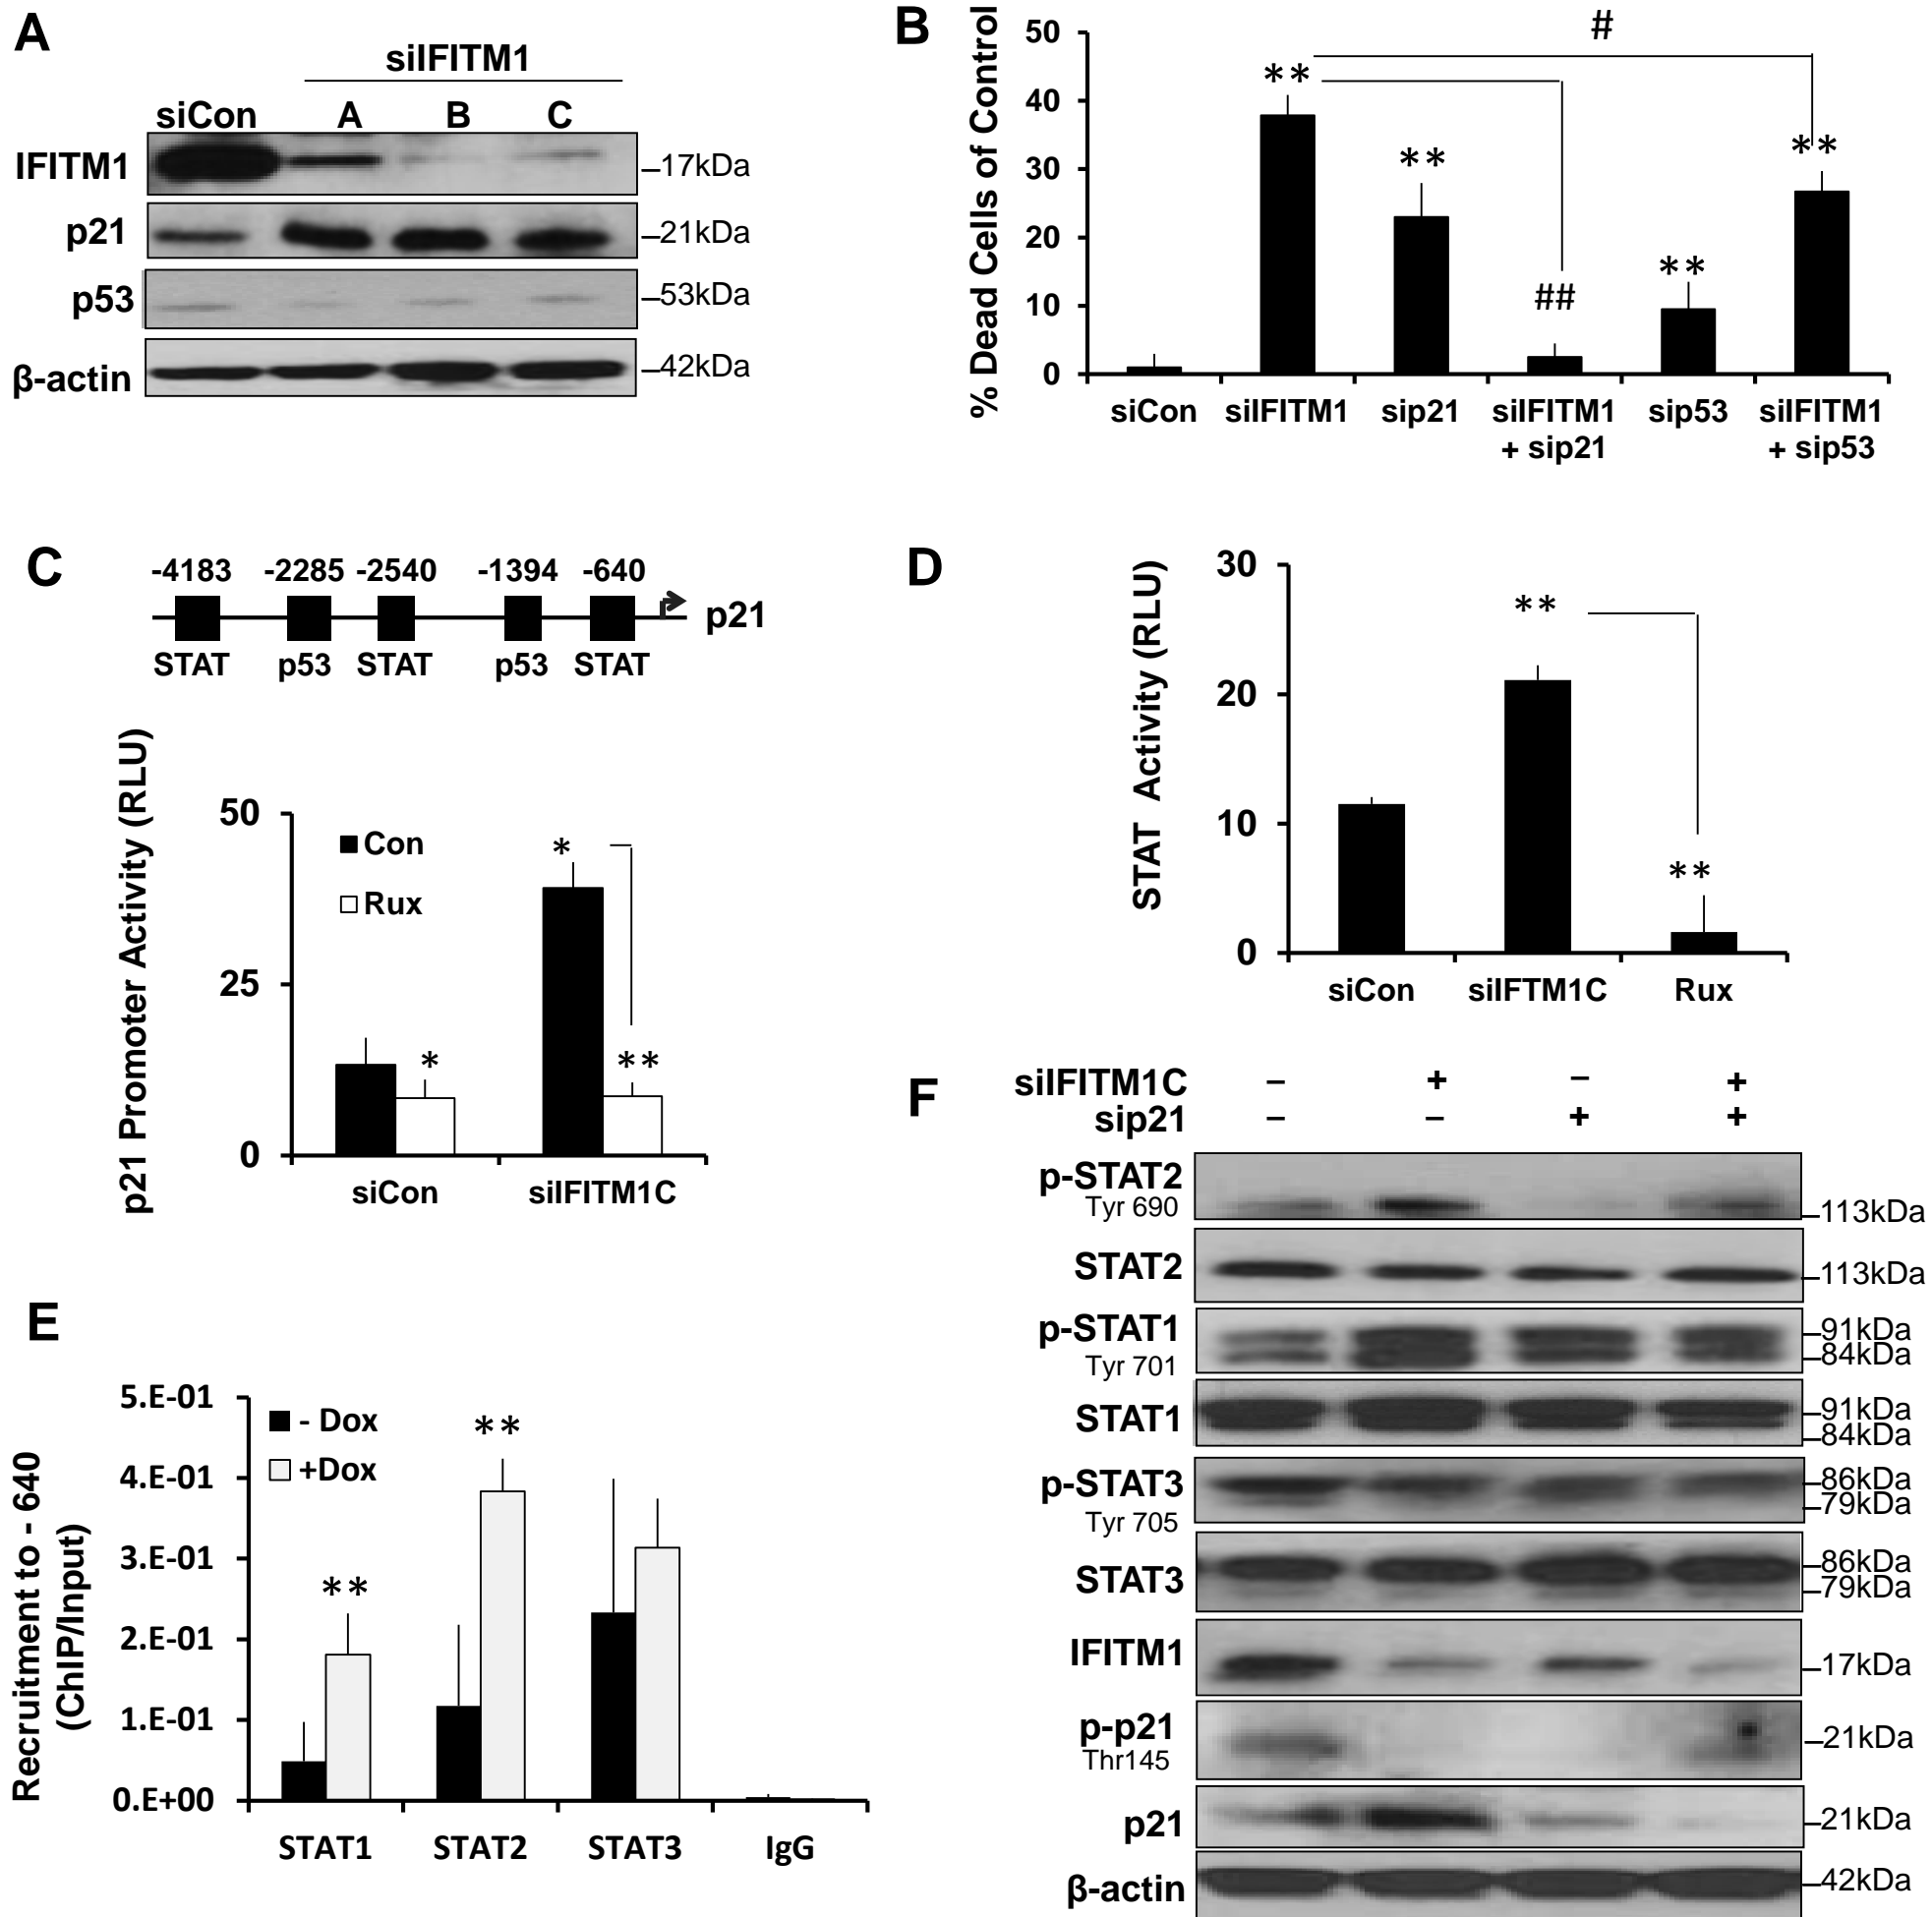

Supplement: NIHMS867561-supplement-1.pdf [file NIHMS867561-supplement-1.pdf]

**A**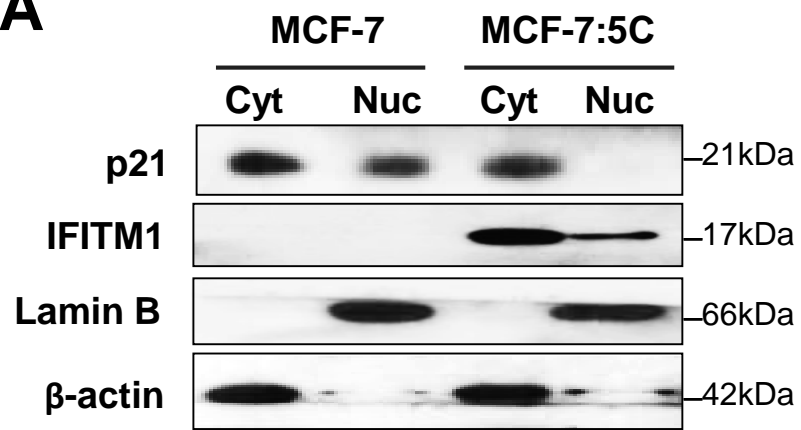**B**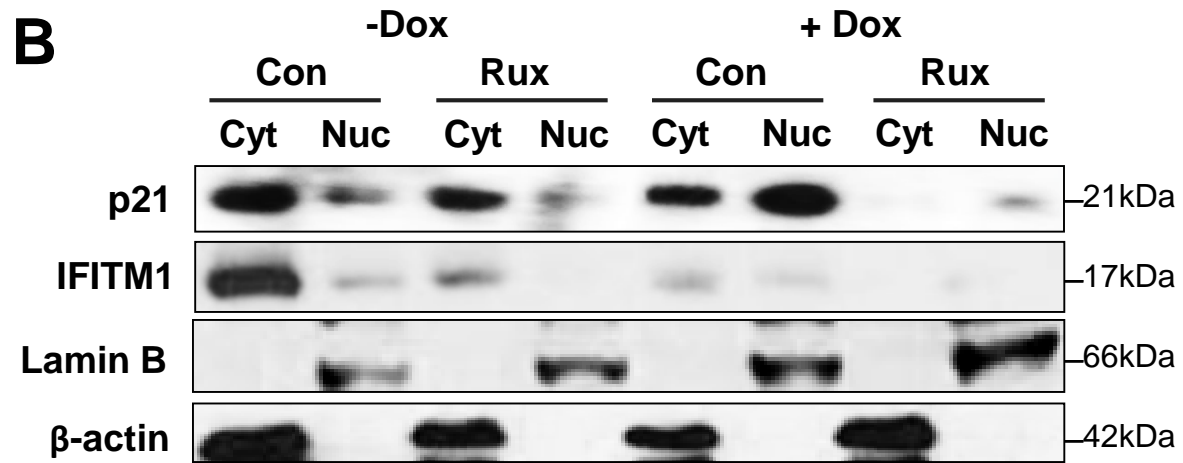**C****- Dox****+ Dox**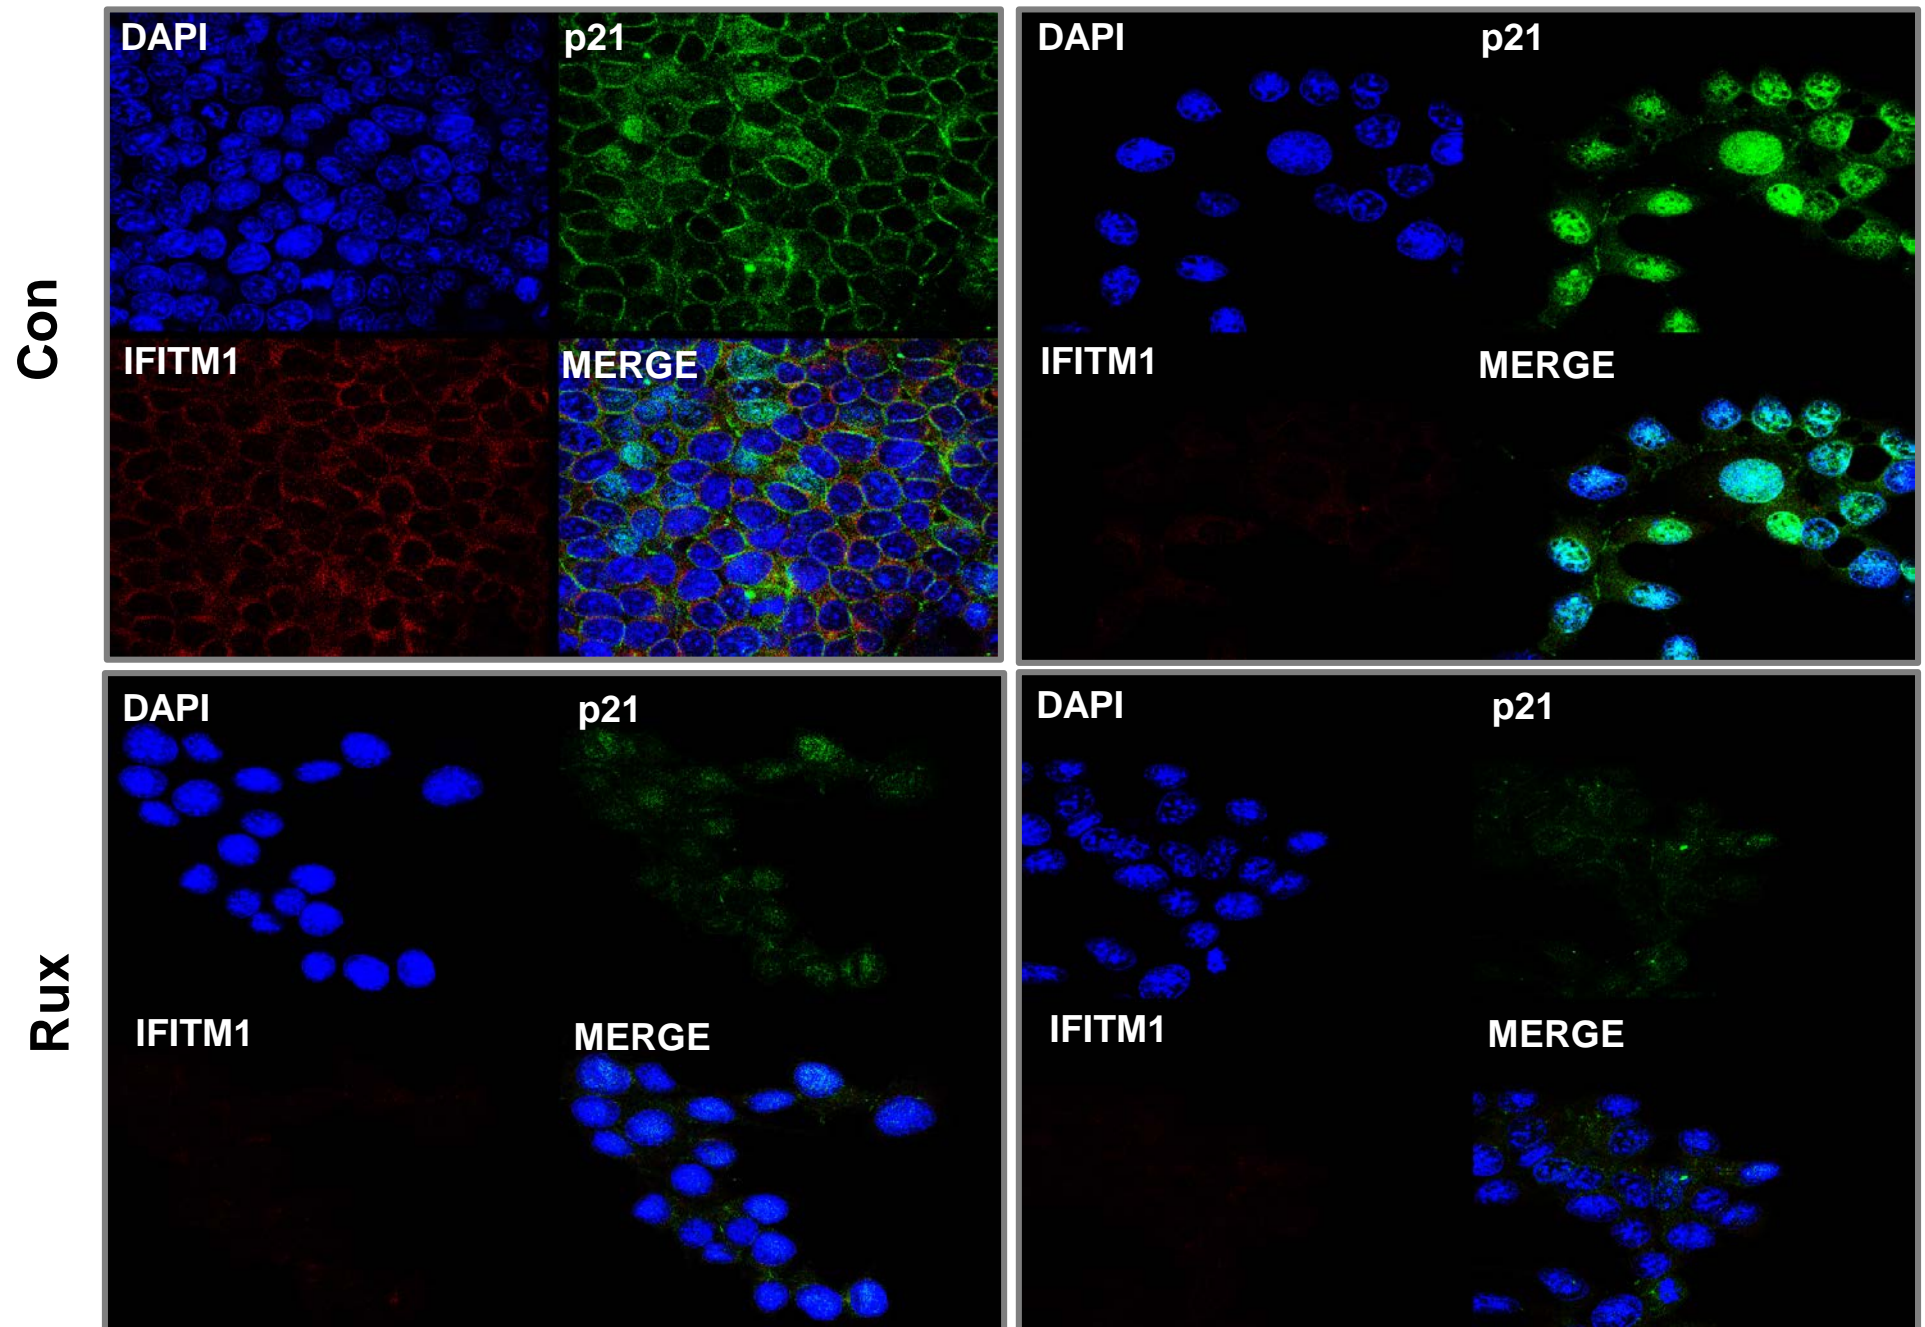

Supplement: NIHMS867561-supplement-2.pdf [file NIHMS867561-supplement-2.pdf]
